1  
2 **Viral infection switches the balance between bacterial and eukaryotic recyclers**  
3 **of organic matter during algal blooms**

4 Flora Vincent<sup>§1</sup>, Matti Gralka<sup>§2</sup>, Guy Schleyer<sup>1</sup>, Daniella Schatz<sup>1</sup>, Miguel Cabrera-Brufau<sup>3</sup>,  
5 Constanze Kuhlisch<sup>1</sup>, Andreas Sichert<sup>2,4</sup>, Silvia Vidal-Melgosa<sup>4,8</sup>, Kyle Mayers<sup>5</sup>, Noa Barak-  
6 Gavish<sup>1</sup>, J.Michel Flores<sup>6</sup>, Marta Masdeu-Navarro<sup>3</sup>, Jorun Karin Egge<sup>7</sup>, Aud Larsen<sup>5,7</sup>, Jan-  
7 Hendrik Heheman<sup>4,8</sup>, Celia Marrasé<sup>3</sup>, Rafel Simó<sup>3</sup>, Otto X. Cordero<sup>2</sup>, Assaf Vardi<sup>1\*</sup>

8

9 **Affiliations:**

10 <sup>1</sup> Department of Plant and Environmental Sciences, Weizmann Institute of Science, Rehovot  
11 7610001, Israel.

12 <sup>2</sup> Department of Civil and Environmental Engineering, Massachusetts Institute of Technology, 15  
13 Vassar St, Cambridge, MA 02145

14 <sup>3</sup> Institut de Ciències del Mar, CSIC, Passeig Marítim de la Barceloneta 37-49, 08003, Barcelona,  
15 Catalonia, Spain

16 <sup>4</sup> Max Planck Institute for Marine Microbiology, 28359, Bremen, Germany

17 <sup>5</sup> NORCE Norwegian Research Centre, 5008 Bergen, Norway

18 <sup>6</sup> Department of Earth and Planetary Science, Weizmann Institute of Science, Rehovot, 7610001,  
19 Israel.

20 <sup>7</sup> Department of Biological Sciences (BIO), University of Bergen, Thormøhlensgaten 53A/B, 5020  
21 Bergen, Norway

22 <sup>8</sup> Center for Marine Environmental Sciences (MARUM), University of Bremen (MARUM),  
23 28359, Bremen, Germany

24

25 <sup>§</sup>These authors contributed equally to this work

26 \*Corresponding author: [assaf.vardi@weizmann.ac.il](mailto:assaf.vardi@weizmann.ac.il)

27

28 ***Abstract.***

29 Algal blooms are hotspots of marine primary production and play central roles in microbial  
30 ecology and global nutrient cycling. When blooms collapse, organic carbon is transferred to higher  
31 trophic levels, microbial respiration or sinking in proportions that depend on the dominant  
32 mortality agent. Viral infection can lead to bloom termination, but its impact on the fate of carbon  
33 remains an open question. Here, we characterized the consequences of viral infection on the  
34 microbiome composition and biogeochemical landscape of marine ecosystems by conducting a  
35 large-scale mesocosm experiment. Monitoring of seven induced coccolithophore blooms, which  
36 showed different degrees of viral infection, revealed that only high levels of viral infection caused  
37 significant shifts in the composition of free-living bacterial and eukaryotic assemblages.  
38 Intriguingly, viral infection favored the growth of eukaryotic heterotrophs (thraustochytrids) over  
39 bacteria as potential recyclers of organic matter. By combining modeling and quantification of

40 active viral infection at a single-cell resolution, we estimate that viral infection can increase per-  
41 cell rates of extracellular carbon release by 2-4.5 fold. This happened via production of acidic  
42 polysaccharides and particulate inorganic carbon, two major contributors to carbon sinking into  
43 the deep ocean. These results reveal the impact of viral infection on the fate of carbon through  
44 microbial recyclers of organic matter in large-scale coccolithophore blooms.

45

#### 46 ***Introduction.***

47 Marine algae are responsible for half of Earth's primary production and form the basis of the  
48 oceanic food chain<sup>1</sup>. Algal blooms<sup>2</sup> are ephemeral events of phytoplankton proliferation that occur  
49 annually across the globe<sup>3</sup> covering thousands of square kilometers. Upon demise, a small fraction  
50 of algal biomass is sequestered into the deep sea; the rest is transferred to higher trophic levels via  
51 predation, or recycled by heterotrophic bacteria and their predators, a process called the "microbial  
52 loop"<sup>4,5</sup>. It has long been hypothesized that the cause of bloom termination affects the surrounding  
53 microbiome and fate of carbon. Viral infection enhances lysis of host cells and release of dissolved  
54 organic matter (DOM), leading to bacterial growth at the expense of organic carbon sinking, in a  
55 process coined the "viral shunt"<sup>6</sup>. It has also been suggested that viral infection increases particle  
56 formation and thus biomass sinking. This accelerates the biologically driven sequestration of  
57 carbon into the deep sea in the so-called "viral shuttle" process<sup>7,8</sup>. However, we still lack  
58 quantitative assessment of how viruses alter microbial composition and influence the fate of carbon  
59 during algal blooms.

60

61 In order to provide a holistic and quantitative view of viral infection and its effect on carbon flow  
62 in the ocean, we investigated the dynamics of seven replicate mesocosm blooms of the  
63 cosmopolitan calcifying microalga *Emiliania huxleyi*. The blooms were induced by nutrient  
64 addition to a natural microbial community from the Norwegian fjord of Raunefjorden and the  
65 different enclosures spontaneously showed absent, moderate, or high levels of viral infection of  
66 the dominant alga. Combining daily monitoring of a variety of biological and biogeochemical  
67 parameters, we quantified the impact of viral infection on the associate eukaryotic and bacterial  
68 communities and on carbon cycling from the cellular to the biogeochemical level. Our results  
69 demonstrate how viruses impact microbial communities in coccolithophore blooms and their  
70 biogeochemical consequence on the fate of carbon.

71

#### 72 ***Succession of prominent community members during algal bloom dynamics***

73 Our mesocosm experiment consisted of four uncovered enclosures (bag 1-bag 4) and three air-  
74 tight sealed enclosures to collect aerosols (bag 5-bag 7). The enclosures were immersed in a fjord  
75 near Bergen, Norway, filled with 11m<sup>3</sup> of fjord water containing natural planktonic communities  
76 (**Fig. 1a**) and nutrients were added on series of consecutive days (**Fig. 1b**). During 24 days, we  
77 monitored phytoplankton and bacterial cell counts using flow cytometry, determined microbiome  
78 composition using amplicon sequencing (bacterial and eukaryotic), measured various  
79 biogeochemical parameters (see Methods), and determined infection states of single cells using  
80 single molecule fluorescent *in situ* hybridization<sup>9</sup>. These biological and chemical features were  
81 compared to the surrounding fjord waters.

82 In the initial phase (Day 0-10), the enclosures were nitrate and phosphate replete following  
83 nutrient addition; at later stages (Day 10-23), the enclosures were nitrate, but not phosphate,  
84 limited (**Fig. 1b**). Bulk chlorophyll measurements displayed two peaks in all enclosures, with a  
85 first smaller phytoplankton bloom (Day 0-10) followed by a second bloom reaching 25 µg/L of

86 chlorophyll (Day 10-23). Calcified *E. huxleyi* cells, quantified by flow cytometry, dominated the  
87 second bloom (**Fig. 1c**). *E. huxleyi* is a cosmopolitan bloom-forming alga and one of the planet's  
88 major calcite producers, causing the transport of large amounts of carbon into sediments<sup>10</sup>. In  
89 addition to slight differences in average *E. huxleyi* cell abundance between covered and uncovered  
90 enclosures, we also observed stark differences in *E. huxleyi* demise dynamics across bags (Day  
91 18-24), with up to 90% lower algae abundances in bags 4 and 7 compared to the highest  
92 concentration within each day. Previous studies attribute the demise of natural blooms of *E. huxleyi*  
93 to virus-induced mortality caused by the *E. huxleyi*-specific giant coccolithovirus (EhV)<sup>11-13</sup>. To  
94 assess the impact of EhV, we estimated its abundance in the 2-20  $\mu\text{m}$  size fraction (to focus on  
95 infected *E. huxleyi* cells and viral particles associated with its biomass) by qPCR of the major  
96 capsid protein (*mcp*) gene (**Fig. 1d**). Viral abundance varied considerably between replicate  
97 mesocosms: bag 7 (covered) and bag 4 (uncovered) showed high concentrations of biomass-  
98 associated EhV with up to  $1.54 \times 10^{10}$  *mcp* copies/L and  $1.42 \times 10^{10}$  *mcp* copies/L, respectively, while  
99 bag 5 (covered) and bag 3 (uncovered) showed low to no detectable viral load. Virus-induced  
100 mortality had a direct impact on algal abundance: viral abundance explained 81% of the variance  
101 in *E. huxleyi* concentration across enclosures, suggesting that viral concentration controls the  
102 magnitude of an *E. huxleyi* bloom (**Fig. 1e**). For this estimate, we controlled for the different *E.*  
103 *huxleyi* abundances due to bag cover (bags 5-7) by adding the difference between covered and  
104 uncovered bag averages to the uncovered bags. Nonetheless, the fact that bloom demise was  
105 observed even with low or no viral infection suggested that other mortality agents may also  
106 dominate in *E. huxleyi* blooms. In enclosures with low viral load (bags 1, 3, 5, and 6), we observed  
107 up to a six-fold increase in ciliates that could potentially graze on *E. huxleyi*<sup>14</sup> (measured by  
108 imaging flow microscopy, **Fig. 1i**).

109 The first phytoplankton bloom (Day 0-10) which we termed the mixed bloom, preceding  
110 the *E. huxleyi* bloom, was dominated by the pico-phytoplankton *Bathycoccus* and *Micromonas*,  
111 representing over 40% of the community in the 0.2-2  $\mu\text{m}$  size-fraction (**Supplementary Fig. 1**).  
112 This bloom reached  $1.81 \times 10^8$  cell/L in bag 5 (**Fig. 1f**). Nano-phytoplankton (**Fig. 1g**) were also  
113 important players in this mixed bloom and sequencing of the 2-20  $\mu\text{m}$  size fraction 18S rDNA  
114 revealed that dinoflagellates (Group-I Clade-I) were especially abundant (see further information  
115 below).

116 Phytoplankton cells fix inorganic carbon into organic biomass, and secrete part of it in the  
117 form of metabolites that heterotrophic bacteria can use for growth<sup>15-18</sup>. Interestingly, the dissolved  
118 organic carbon (DOC) concentration increased only moderately after each of the blooms  
119 (**Supplementary Fig. 2**). This could be explained by a fast-bacterial assimilation as we observed  
120 a more than tenfold exponential increase in bacterial abundance between days 5-13 (**Fig. 1h**),  
121 doubling every 24-36 hours. By contrast, bacteria were less abundant during the *E. huxleyi* bloom  
122 and demise compared to the mixed bloom, showing an average of less than twofold increase after  
123 day 20 (**Fig. 1h**). In the two most infected bags, bag 4 and bag 7, the increase in bacterial abundance  
124 was 2-3-fold during the demise phase. Overall, total viral load in the different enclosures was  
125 significantly negatively correlated with the abundance of host (*E. huxleyi*) and grazer (ciliates)  
126 concentrations but not with pico-nano-phytoplankton or bacteria abundances (**Fig. 1j**). The  
127 negative correlation between grazing and viral lysis was confirmed via grazing dilution assays  
128 across the whole mesocosm (**Supplementary Fig. 3**), suggesting that the two top-down mortality  
129 agents compete during algal blooms.

130  
131

132

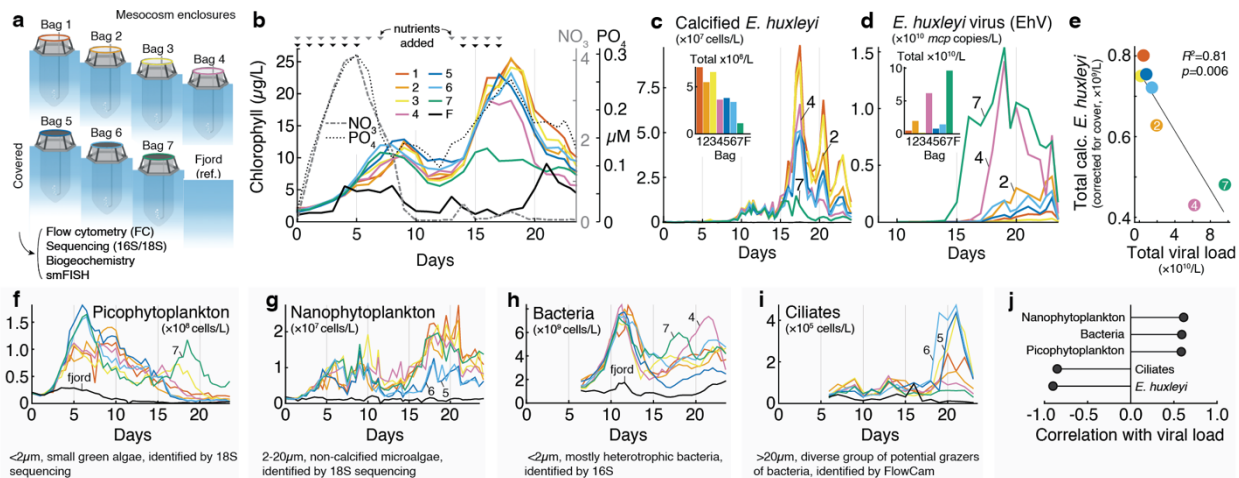

133

134

135

136

137

138

139

140

141

142

143

144

145

146

147

148

149

150

151

152

153

154

155

156

157

158

159

160

161

162

163

164

165

**Figure 1: An overview of the mesocosm setup and dynamics of prominent community members.** **a**, Schematic view of the seven mesocosm enclosures during the mesocosm experiment. The fjord water was used as the microbial inoculum seeding the enclosures and was sampled as a reference for microbial dynamics under natural conditions. **b**, Fluorometric chlorophyll measurements (left axis), where each color corresponds to a different bag. Nitrate and phosphate concentrations over time averaged across enclosures (right axes). Arrows on the top indicate nutrient addition. **c**, Calcified *E. huxleyi* abundance measured by flow cytometry, based on high side scatter and high chlorophyll signals. The small bar chart shows the integrated abundance of *E. huxleyi* over time (see Methods). **d**, Concentration of EhV based on qPCR of *mcp* (major capsid protein) gene in 2-20  $\mu\text{m}$  pore filters. The small bar chart shows the integrated abundance of EhV over time. **e**, Scatter plot of total calcified *E. huxleyi* abundance (corrected for bag cover) as a function of total viral abundance, with a linear model fit. **f-i**, Absolute abundances of key players in the microbial succession, sorted by peak abundance time: **f**, picophytoplankton abundance measured by flow cytometry, based on low side scatter and low chlorophyll signals; **g**, non-calcifying *E. huxleyi* and other nanophytoplankton abundance measured by flow cytometry, based on low side scatter and high chlorophyll signals; **h**, absolute abundance of bacteria measured by flow cytometry after SYBR green staining; **i**, ciliate abundance measured by imaging flow microscopy and annotated using EcoTaxa. **j**, Correlation between EhV viral load and average planktonic abundances across bags.

### Effects of viral infection on the composition of microbial assemblages

To understand how viral infection can alter the composition of planktonic communities, we conducted microbiome profiling of all the mesocosm enclosures. We opted for a detailed time series based on samples collected daily of both the bacterial (0.2-2  $\mu\text{m}$  size fraction, 16S amplicons) and nanoeukaryotic (2-20  $\mu\text{m}$  size fraction, 18S amplicons) communities. Throughout the two blooms, we observed a repeatable pattern of eukaryotic and bacterial taxa successions (**Fig. 2a**). The relative abundance of *E. huxleyi* defines three major phases: the mixed bloom, (days 0-8), the exponential growth phase of *E. huxleyi* (days 8-17), and its demise (days 18-23). Nanoeukaryotes, clustered according to the relative abundance patterns at the genus level, showed a rapid succession of boom-and-bust cycles, each about 5-10 days long (**Fig. 2b, Supplementary Fig. 4,5**). Unique clusters of nanoeukaryote species bloom upon *E. huxleyi* growth (Cluster 5) and

166 demise (Cluster 6) thus defining a bloom associated protist microbiome. By comparison, bacterial  
167 succession was much less dynamic: the composition at the order level was relatively stable (**Fig.**  
168 **2c**). The mixed bloom was associated with bacterial groups known to be involved in algal biomass  
169 remineralization, such as Flavobacteriales<sup>19,20</sup> and Rhodobacterales. We also observed a slow,  
170 more than ten-fold increase in relative abundance of SAR11, usually found in oligotrophic  
171 environments<sup>21</sup>, throughout the *E. huxleyi* bloom. This facilitation of SAR11 growth by *E. huxleyi*  
172 is in line with previous observations of their co-occurrence<sup>22</sup> and could be mediated by the  
173 organosulfur compound dimethylsulfoniopropionate (DMSP), which *E. huxleyi* produces and  
174 excretes<sup>23,24</sup> and that SAR11 can utilize as a reduced source of sulfur<sup>25</sup>. In contrast to the relative  
175 stability of the bacterial composition at the order level, there were clear successions at the genus  
176 level within the two dominant bacterial orders, *Flavobacteriales* and *Rhodobacterales* (**Fig. 2d,**  
177 **Supplementary Fig. 6**). The *E. huxleyi* bloom and demise coincided with the relative increase of  
178 two genera: *Tenacibaculum*, a potential fish parasite frequently associated with algal blooms<sup>20</sup>,  
179 and *Sulfitobacter*, a genus containing DMSP degrading species that are pathogenic to *E. huxleyi*  
180 cells<sup>24</sup>. Gammaproteobacteria such as *Vibrionales*, *Pseudomonadales*, or *Alteromonadales*, often  
181 reported as dominant members in bloom-associated communities<sup>26</sup>, were absent in the planktonic  
182 populations, but may thrive in the particle-associated niche (in the >20 µm size fraction).

183 To further compare bacterial and eukaryotic dynamics, we computed their turnover time  
184 as defined by the exponential rate at which the Bray-Curtis similarity declined over time (see  
185 Methods). Given their small size and known fast growth rates, we expected heterotrophic bacteria  
186 to respond much faster to our nutrient additions (N and P) than eukaryotes. To our surprise,  
187 eukaryotes were the first responders to nutrient addition, and their assemblage turned over much  
188 faster (every five days initially) than bacteria which only showed significant growth towards the  
189 end of the first bloom (turnover every 10 days) (**Fig. 2e**). The sequence of response to the nutrient  
190 addition can be explained by the direction of nutrient flow in phytoplankton blooms when nutrients  
191 increase: eukaryotes, especially phytoplankton, were likely nitrogen and/or phosphorous-limited  
192 at the start of the experiment, whereas bacteria appeared to be carbon-limited and required organic  
193 carbon released upon demise of the first mixed bloom in order to grow.

194 Despite strong compositional similarities amongst the seven enclosures, the bacterial and  
195 nanoeukaryotic assemblages gradually diverged between enclosures after the mixed bloom.  
196 During the *E. huxleyi* bloom demise, bag 7 (the most virally infected) diverged in microbiome  
197 composition from the other enclosures (**Fig. 2f, Supplementary Fig. 7**). Eukaryotes such as  
198 MAST-1C (a heterotrophic flagellate), *Woloszynskia* (a mixotrophic dinoflagellate), as well as the  
199 cyanobacterium *Synechococcus* and the bacterium *Psychroserpens* (family *Flavobacteriaceae*)  
200 were overrepresented in bag 7 (**Fig. 2g, Supplementary Fig. 8,9**). The growth of *Synechococcus*  
201 during high viral infection suggests that the resulting flux of DOM benefit not only heterotrophic  
202 but also autotrophic bacterial growth<sup>27,28</sup>. Recent ecosystem modeling suggests this may be due to  
203 efficient recycling of growth-limiting nutrients in the photic zone during viral infection<sup>29</sup>. The  
204 eukaryotes *Pedinellale* (autotroph) and the bacterium *Tenacibaculum* (family *Flavobacteriaceae*)  
205 grew less in bag 7 than in the rest of the enclosures. In contrast to observation in the highly infected  
206 bag 7, the moderately infected bag 4 showed a 16S and 18S-based composition that did not differ  
207 significantly from the less infected enclosures (**Fig 2h**). These findings suggest that substantial  
208 change in microbial assemblages during viral induced *E. huxleyi* demise is conditional on high  
209 viral infection levels.

210  
211

212  
213

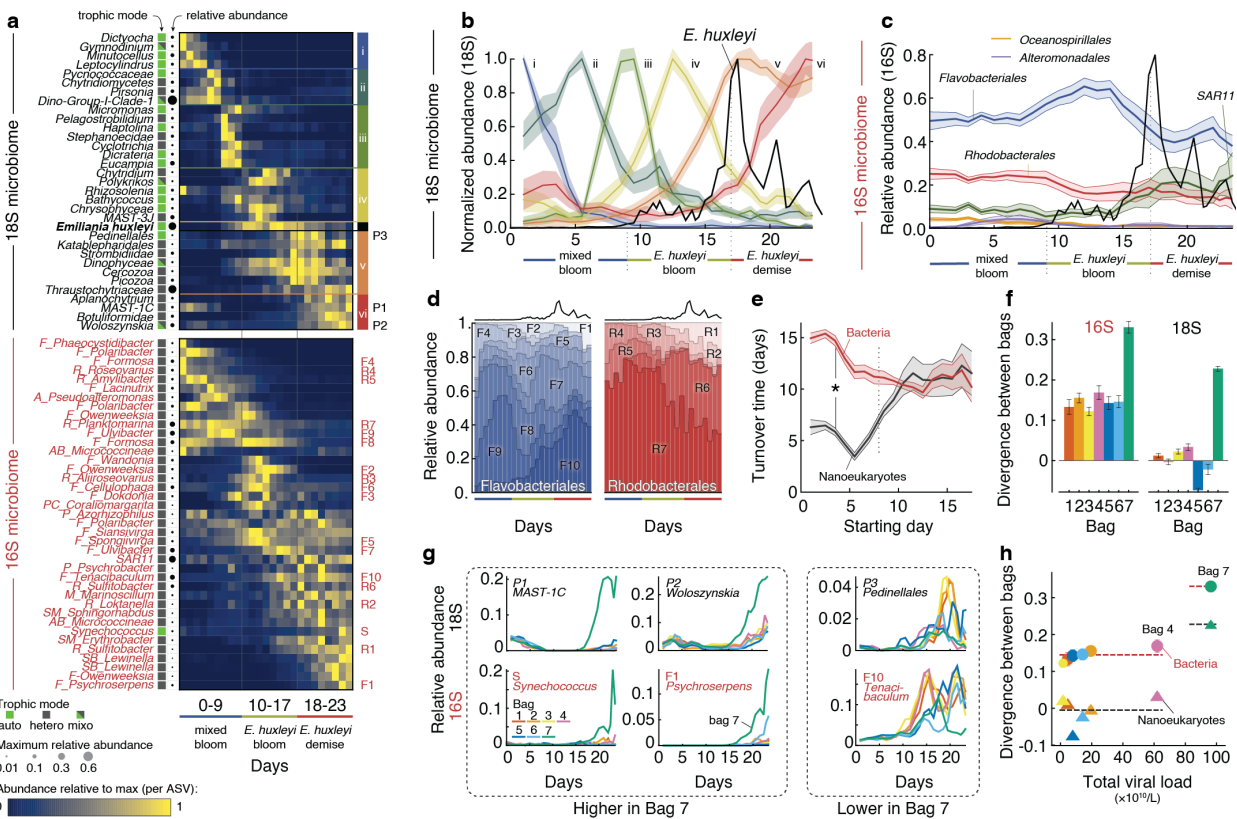

214

215

216

217

218

219

220

221

222

223

224

225

226

227

228

229

230

231

232

233

234

235

236

**Figure 2: Microbial succession during the growth and demise of algal blooms with different viral loads.** **a**, Bacterial and eukaryotic microbial succession throughout the experiment duration, averaged across enclosures. Each row is an amplicon sequencing variant (ASV) with bacteria in red and eukaryotes in black. The trophic modes of each ASV are detailed in the box color with autotrophs in green, heterotrophs in grey, and mixotrophs in green/grey. Days are shown in columns. 18S species are grouped by clusters of different colors, indicated on the right of the heatmap. 16S abbreviations: F: Flavobacteriales; R: Rhodobacteriales; A: Alteromonadales AB: Actinobacteridae; M: Methylophilales; P: Pseudomonadales; PC: Punicicoccales; SM: Sphingomonadales; SB: Sphingobacteriales. **b**, Succession of 18S-based ASVs in the 2-20 $\mu$ m fraction, clustered by similarity of their relative abundance dynamics averaged across bags. The shaded area represents the standard deviation within each cluster. The absolute abundance of *E. huxleyi* enumerated with flow cytometry is overlaid as a guide (black line, not to scale). Each cluster is normalized to its own maximum abundance and their species composition is detailed in panel **a**. **c**, Relative abundance of major bacterial orders throughout the bloom, averaged for all enclosures using 16S amplicon sequencing of the 0.2-2  $\mu$ m fraction. The absolute abundance of *E. huxleyi* enumerated with flow cytometry is overlaid as a guide (black line, not to scale). **d**, Relative abundance of different Flavobacteria and Rhodobacteria genera within each order averaged across all enclosures. The dark line on the top represents *E. huxleyi* abundance trends as a guide. **e**, Rate at which bacteria and nanoeukaryotic community similarities change over time. Nanoeukaryotic communities initially turnover much faster than the bacterial ones (until day 8,  $p < 0.001$  by Kolmogorov-Smirnov test). **f**, Compositional divergence within one bag, compared across several days, for 16S and 18S. The divergence of a bag is defined as the change in pairwise Bray-Curtis

237 distance between the focal bag and all other bags from the start of the *E. huxleyi* bloom to its  
238 demise. **g**, Eukaryotic and bacterial ASVs that are overrepresented or underrepresented in bag 7.  
239 **h**, Correlation, per bag and per 16S or 18S ASV, between total viral load and percentage  
240 dissimilarity in microbial composition from one day to another.

241

### 242 ***Viral infection impacts the composition of organic matter recyclers***

243 During *E. huxleyi* demise, a large flux of organic carbon derived from lysed phytoplankton  
244 biomass became available for bacterial recycling, with estimates of about 270  $\mu\text{g C/L/day}$  from *E.*  
245 *huxleyi* alone (see Methods). Yet bacterial growth was moderate. This could be explained by  
246 several factors, including enrichment of particle-attached (e.g., biofilm-like) bacterial growth that  
247 did not influence the free-living abundances, removal of bacteria by aggregation and sinking, or  
248 increased bacterial cell death by phages or bacterivores<sup>30</sup>. However, the abundance of typical  
249 bacterivores like dinoflagellates remained low and ciliate abundance only increased late into the  
250 demise of the *E. huxleyi* bloom (day 20-23) (**Fig. 1i**). The low number of predators, combined with  
251 the observation that dissolved organic carbon concentration stabilized during bloom demise, led  
252 us to hypothesize that bacteria competed for nutrients with another group of heterotrophs.

253 To identify other heterotrophs, we re-examined the eukaryotic microbiome in search for  
254 organic matter recyclers. Functional annotation of the nanoeukaryotes (see Methods) revealed that  
255 while eukaryotic assemblages were composed of autotrophs and mixotrophs during the first mixed  
256 bloom, heterotrophs, and specifically osmotrophs, became highly abundant through the *E. huxleyi*  
257 bloom and demise (**Fig. 3a**). These heterotrophs were dominated by thraustochytrids  
258 (*Thraustochytriaceae* and *Aplanochytrium* in **Fig. 2a**), part of a diverse lineage of eukaryotic  
259 osmotrophs<sup>31</sup>, which contributed over 50% of all 18S rDNA reads in the 2-20  $\mu\text{m}$  size fraction  
260 during bloom demise, across all bags. Thraustochytrids are known to possess an arsenal of  
261 extracellular digestive enzymes, making them important decomposers of organic matter in coastal  
262 sediments<sup>32</sup> and deep-sea particles<sup>33</sup>. With their large intracellular lipid reserves, they also serve  
263 as an important food source for higher trophic levels<sup>34</sup>. However, the importance of  
264 thraustochytrids in microbial food webs has yet to be explored. During algal blooms, they could  
265 potentially play a significant role as decomposers<sup>35</sup>, bacterivores, or even parasites<sup>36</sup>. Some  
266 members of the group are also known to produce ectoplasmic nets, through which they can extract  
267 intracellular nutrients of preyed cells<sup>37,38</sup> such as senescent diatoms<sup>39,40</sup>.

268 In order to quantify the absolute abundance of thraustochytrids, we performed digital  
269 droplet PCR (ddPCR) targeting thraustochytrid 18S rDNA across all mesocosm enclosures. While  
270 undetected during the mixed bloom, thraustochytrids total biomass, estimated based on values of  
271 64 18S rDNA copies/cell (see Methods) and  $1.65 \times 10^{-10}$  g of carbon/cell<sup>41</sup> increased steadily after  
272 day 16 and was comparable to that of bacteria during the *E. huxleyi* bloom demise (**Fig. 3b**,  
273 **Supplementary Table 1**). Though we cannot elucidate the mechanism of competition between  
274 thraustochytrids and heterotrophic bacteria, possibilities include direct inhibition of bacterial  
275 growth by antimicrobial lipids<sup>42</sup>, niche separation in the degradation of different components of  
276 the organic matter, or efficient capture of organic matter by ectoplasmic nets directly from  
277 senescent *E. huxleyi* cells. Thraustochytrids are most likely not intracellular parasites of *E. huxleyi*,  
278 since we did not detect any 18S amplicon reads of this group within *E. huxleyi* cells that were  
279 sorted and sequenced.

280 While the *E. huxleyi* demise reproducibly triggered the growth of eukaryotic degraders in  
281 all bags, thraustochytrids growth was further enhanced in bags with strong viral infection of *E.*  
282 *huxleyi* (**Fig. 3c**). Specifically, total viral load was well correlated with the exponential rate at

283 which the ratio of thraustochytrid to bacterial biomass increased (**Fig. 3d**). We further examined  
 284 the ecological importance of this phenomena by using samples collected from an open-ocean *E.*  
 285 *huxleyi* bloom in the North Atlantic<sup>43</sup> where different phases of viral infection were observed. We  
 286 quantified the absolute abundances of thraustochytrid using ddPCR and compared it with bacterial  
 287 production rates measured with leucine incorporation<sup>44</sup>. We detected higher thraustochytrid  
 288 abundance and lower bacterial production during late viral infection phase relative to the early  
 289 phase of bloom infection (**Fig. 3e**), suggesting that thraustochytrids are major beneficiaries from viral  
 290 induced *E. huxleyi* bloom demise. Sequencing of larger 18S rDNA fragments from the mesocosm  
 291 and open ocean samples revealed a single dominant species across these ecosystems, whose closest  
 292 relative is an uncultivated clone (94% identity), potentially indicating that this thraustochytrid  
 293 species specializes on exudates from *E. huxleyi* demise and has not been reported before  
 294 (**Supplementary Fig. 10**).  
 295  
 296

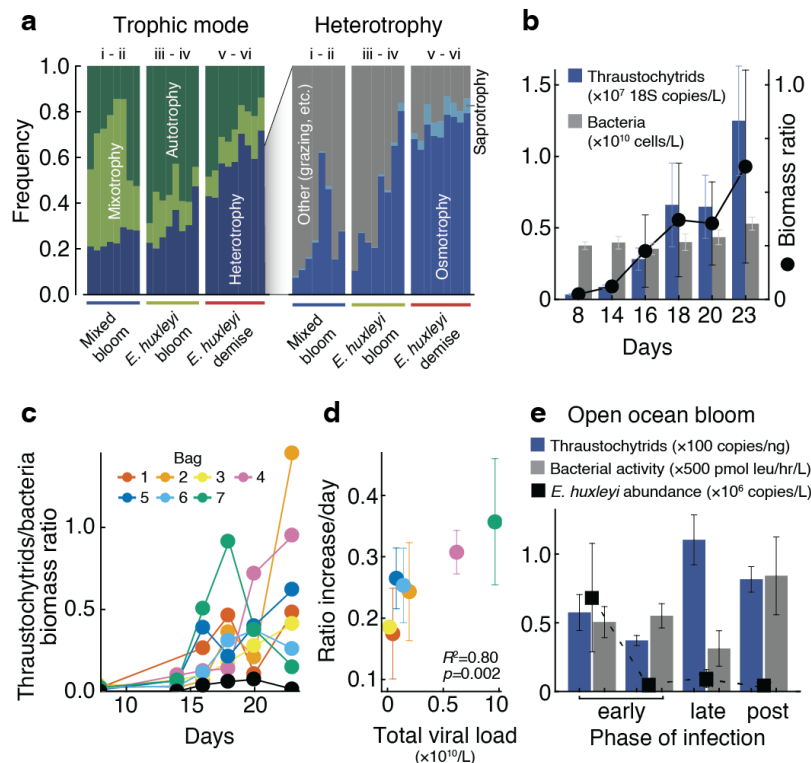

297  
 298 **Figure 3: Viral induced bloom demise changes the composition of organic matter recyclers.**  
 299 **a**, Analysis of predicted eukaryotic traits plotted per phase of the *E. huxleyi* bloom. Relative  
 300 abundance of autotrophy, mixotrophy, and heterotrophy, defined through literature search (left).  
 301 Trophic modes within heterotrophy, as defined by<sup>45</sup> (right). **b**, Thraustochytrid to bacteria ratios  
 302 throughout the experiment duration. The blue bars represent thraustochytrid concentrations  
 303 obtained by digital droplet PCR and the grey bars represent bacterial concentrations measured by  
 304 flow cytometry, averaged across all bags. Circles represent ratios of thraustochytrids to bacterial  
 305 biomass in the averaged mesocosm enclosures, using a conservative conversion factor of  
 306 thraustochytrid copies/L to cell/L (see Methods and **Supplementary Table 1**). **c**, Converting  
 307 thraustochytrid and bacteria abundances to biomass to obtain biomass ratios shows increasing ratio  
 308 during *E. huxleyi* bloom (days 10-17) and demise (days 17-24) in all bags. **d**, Exponential rate of



309 change of the biomass ratio of thraustochytrids to bacteria plotted as a function of total viral load,  
310 per bag (see Methods). e, Concentration of thraustochytrids measured by ddPCR, *E. huxleyi* cells  
311 measured by qPCR, and bacterial production using leucine incorporation<sup>44</sup>, in three phases of an  
312 open ocean *E. huxleyi* bloom infection.

313

### 314 ***Viral infection enhances population-level and per-cell rates of carbon release***

315 During *E. huxleyi* blooms, which can cover over 100,000 square kilometers in the ocean<sup>46</sup>, cell  
316 concentrations can account for 75% or more of the total number of photosynthetic plankton in the  
317 area<sup>46</sup>. The algal biomass and coccoliths that form the *E. huxleyi*'s calcified shell have profound  
318 impact on the carbon cycle and global CaCO<sub>3</sub> export flux<sup>47</sup>. We therefore investigated the  
319 biogeochemical consequences of viral infection of *E. huxleyi* blooms by quantifying different  
320 components of the carbon cycle, focusing on organic carbon in the form of transparent exopolymer  
321 particles (TEP) and particulate inorganic carbon (PIC).

322 TEP are made of acidic polysaccharides that form due to abiotic coagulation of dissolved  
323 carbohydrates secreted by phytoplankton and are an important component of the marine particulate  
324 organic carbon. TEP represent a potential source of food for bacteria or other heterotrophs<sup>48,49</sup>,  
325 although recent work suggests that certain polysaccharides within TEP can be recalcitrant for  
326 microbes, challenging its degradation<sup>50</sup>. TEP are an essential vector for carbon export by triggering  
327 aggregation and sinking but their chemical composition has only recently been elucidated. To  
328 better identify the polysaccharides in TEP during *E. huxleyi* blooms, we used carbohydrate  
329 microarray analysis on the particulate fraction<sup>51</sup>. Out of the alginate and sulfated fucans epitopes,  
330 the ones recognized by the monoclonal antibodies BAM6<sup>52</sup> and BAM1<sup>53</sup> respectively,  
331 accumulated during the *E. huxleyi* bloom and are thus likely *E. huxleyi*-related (**Fig. 4a**). BAM6  
332 signal decreased during the demise phase, suggesting potential degradation of its recognized  
333 epitope by the demise associated microbiome. In contrast, the accumulation of the epitope detected  
334 with BAM1 suggests that this sulfated fucan did not serve as a substrate for thraustochytrids or  
335 bacteria<sup>54</sup>, but may be part of TEP and thus relevant for carbon export via sinking particles<sup>50</sup>.

336 To decipher the effects of viral infection on TEP production, we modeled TEP  
337 concentration as a function of its producers' abundances (*E. huxleyi*, non-calcified  
338 nanophytoplankton and picophytoplankton) and a TEP loss rate through sinking or degradation  
339 (**Fig. 4b**) that we fitted to *in situ* TEP measurements (**Fig. 4c**) (see Methods). The model described  
340 the TEP abundance well, achieving an average  $R^2$  of 98.8%. Using the model, we estimated that  
341 the amount of TEP produced per *E. huxleyi* cell per day was 60-75% of the total TEP pool at the  
342 onset of bloom demise (**Supplementary Fig. 11**). There was a strong dependence of estimated  
343 TEP per cell on viral infection: TEP production per *E. huxleyi* cell was more than twice as high in  
344 the infected bag 7 than in non-infected bags. Across all bags, there was a strong correlation to total  
345 viral load ( $R^2 = 0.932, p < 0.0005$ , **Fig. 4d**), consistent with previous results suggesting higher  
346 export during viral-associated *E. huxleyi* blooms in open ocean and mesocosm experiments<sup>43,55</sup>.  
347 This suggests that, at the population level, *E. huxleyi* cells secreted twice the amount of carbon in  
348 presence of high viral load. To validate this correlation, we applied the same model for particulate  
349 organic carbon (POC) production. The model gave an excellent fit ( $R^2 > 0.98$  across all bags) but  
350 the estimate for the amount of organic carbon per *E. huxleyi* cell (4-6 pg C/cell, in line with other  
351 estimates<sup>56</sup> (**Supplementary Fig. 12**)) was uncorrelated with the total viral load ( $p > 0.05$ ).

352 Since viral infection remodels the algal host metabolism<sup>57,58</sup>, we hypothesized that infected  
353 and non-infected cells in the same bloom may differ in their actual TEP production, and sought to  
354 quantify this process as opposed to simply averaging TEP over the entire bulk population. To

355 differentiate infected from non-infected cells, we probed viral mRNA in single *E. huxleyi* cells<sup>9</sup>  
356 and obtained a time-course of the fraction of actively infected cells in two different enclosures  
357 (**Supplementary Fig. 13**). At most 10% and 25% of all *E. huxleyi* cells were infected in bags 2  
358 and 4 respectively, reflecting the heterogeneity of cell fates within each bloom succession and  
359 demise. By assuming that non-infected cells produced the same amount of TEP regardless of the  
360 bag's viral load, we estimated that an infected *E. huxleyi* cell produced ~19 pg xanthan gum (XG)  
361 equivalent/day (see Methods), or 4.5 times more TEP than its non-infected bystander cell (**Fig.**  
362 **4e**). Notably, viral infection did not increase secretion of proteinaceous material: the measurement  
363 and modeling of protein-rich particles (Coomassie Stained Particles) (**Supplementary Fig. 14**)  
364 showed no correlation with viral load, indicating that the cellular response to infection is specific  
365 to certain metabolic products.

366 Particulate inorganic carbon (PIC) in the form of calcium carbonate is the basis of one of  
367 the main processes making up the marine carbon cycle, the carbonate pump, by which inorganic  
368 carbon is exported along with organic matter to the deep ocean. A major part of PIC in the ocean  
369 is comprised of coccolithophore shells, particularly *E. huxleyi*'s coccoliths<sup>59</sup>. PIC accumulated  
370 over time in our study (**Fig. 4f**). We fitted the PIC curves to a model accounting for *E. huxleyi*  
371 coccolith production, a degradation rate, and a term allowing for shedding and re-calcification (see  
372 Methods). Like TEP, predicted PIC per *E. huxleyi* cell at the population level was significantly  
373 correlated to total viral load from about 1 to 2 pmol PIC/cell/day ( $R^2 = 0.954, p < 0.0002$ , **Fig.**  
374 **4g**) which is consistent with lab-based measurements<sup>60</sup>. Using the measured fraction of active  
375 single-cell infection, we estimated that infected single cells produced 4.5 times more PIC per cell  
376 than their non-infected bystander cells (**Fig. 4h**). Overall these data suggest that active viral  
377 infection can have remarkable consequences on exportable carbon (TEP and PIC) release both on  
378 the population-level (2-fold increase) and per infected cell (4.5-fold increase).

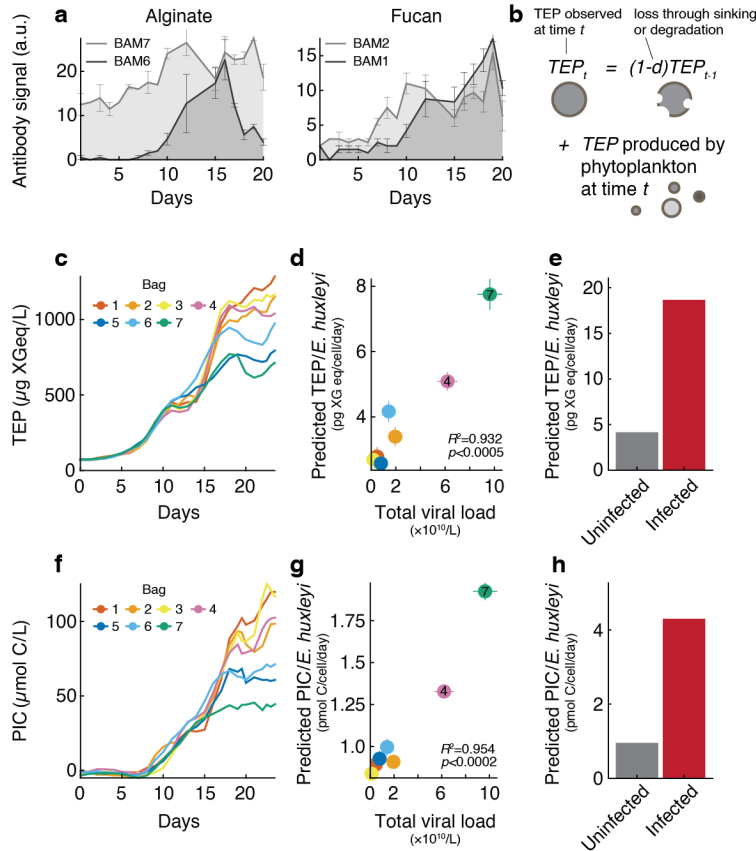

379  
 380 **Figure 4: Viral infection promotes release of PIC and TEP production from a**  
 381 **coccolithophore bloom.** **a**, Alginate and fucan abundance in particulate organic matter (POM)  
 382 over time, based on mixed water from bags 1-4, measured by carbohydrate microarray analysis.  
 383 BAM1, 2, 6 and 7 correspond to glycan-specific monoclonal antibodies, used to measure the  
 384 relative abundance of their recognized polysaccharide epitopes in POM water extracts. **b**, Scheme  
 385 of TEP modeling, as a function of phytoplankton concentrations and degradation rate which  
 386 enables prediction of the *E. huxleyi* contribution to the TEP pool. **c**, TEP concentration measured  
 387 by Alcian blue staining over time, per bag. **d**, Predicted TEP/cell as a function of total viral load  
 388 for each bag, for *E. huxleyi* cells. **e**, Predicted TEP/cell secretion in infected versus non-infected  
 389 *E. huxleyi* cells using intracellular measurements of actively infected single cells. **f**, PIC production  
 390 during algal bloom succession. **g**, Predicted PIC/cell as a function of total viral load for each bag,  
 391 for *E. huxleyi* cells. **h**, Predicted PIC/cell production in infected versus non-infected *E. huxleyi*  
 392 cells using intracellular measurements of actively infected single cells.

393

394

### 395 **Conclusion**

396 Here we provide in depth characterization of the microbial and biogeochemical dynamics of two  
 397 successive algal blooms in replicate mesocosm enclosures, which provides a unique experimental  
 398 platform to quantify the impact of viral infection at the ecosystem level. Starting from the same  
 399 microbial inoculum, our mesocosm enclosures underwent ordered microbial successions that  
 400 culminated in massive blooms of the coccolithophore *E. huxleyi*. Viral infection of *E. huxleyi* took  
 401 drastically different courses in the enclosures, with little to high levels of viral infection leading to  
 402 a bloom demise. Our study made three critical observations regarding the microbial ecology and

403 the biogeochemical effects of algal blooms and their viral infection (**Fig. 5**), generating novel  
404 hypotheses for future lab-based mechanistic studies.

405 First, we showed that viral-induced changes in the microbiome, as in bag 7, are only  
406 observed when there is a high level of viral infection (**Fig. 5 (1)**). Given that only one in seven  
407 enclosures experienced such high levels of viral production, its occurrence in natural ecosystems  
408 may be rare but can profoundly impact microbial diversity and community composition. It is also  
409 possible that the microbiome response takes longer than the duration of our experiment or may be  
410 localized to particle-attached communities. Indeed, as viral infection enhanced TEP production,  
411 this could promote the formation of marine snow and a specific particle-associated microbiome.

412 Second, we estimated that the biomass of eukaryotic osmotrophs can be comparable to that  
413 of heterotrophic bacteria during *E. huxleyi* blooms and demise (**Fig. 5 (2)**) and that viral infection  
414 may enhance their growth (**Fig. 5 (3)**), including in open ocean blooms. This abundance of large,  
415 underappreciated eukaryotic osmotrophs, may shape the carbon flux through the marine trophic  
416 network. Since they are larger than the average bacterium, eukaryotic osmotrophs can escape  
417 grazing by many micrograzers and shorten the carbon transfer to larger predators as zooplankton.  
418 Thus, the competition between prokaryotic and eukaryotic degraders can reshape higher trophic  
419 levels. More generally, our findings highlight that a complete understanding of the carbon flux in  
420 phytoplankton blooms requires deeper understanding of both the associated prokaryotic and  
421 eukaryotic microbial communities and the interactions between them<sup>61</sup>. Currently, only a few  
422 studies explore the competition between thraustochytrids and bacteria for DOM<sup>62</sup>. More work is  
423 needed to fully establish the role of eukaryotic osmotrophs in the microbial loop, especially in the  
424 context of viral infections and the associated metabolome<sup>63</sup>.

425 Third, by relating ecosystem changes and biogeochemical processes to the varying degrees  
426 of active viral infection and lysis, we have shown that even mild viral infection can significantly  
427 affect the production and release of extracellular carbon, both organic and inorganic. In particular,  
428 our experimental setup enabled the parameterization of TEP and PIC production in the absence  
429 (**Fig. 5 (4)**) or presence (**Fig. 5 (5)**) of viral infection<sup>43,55,64</sup>. We estimated that *E. huxleyi* carbon  
430 secretion in the presence of viruses increases between 2 to 4.5-fold per cell, either through a  
431 population level response, or a specific metabolic remodeling of infected cells. Taken together, the  
432 increase in TEP and PIC production per cell could lead to elevated vertical carbon transport  
433 through aggregation and increase of the cellular ballast. Overproduction of TEP by infected cells  
434 increases the formation of sinking aggregates, and may protect non-infected cells by trapping  
435 newly produced virions in sticky particles or can mask receptors needed for viral entry<sup>9</sup>.  
436 Alternatively, TEP could be involved in the transport of virions to neighboring cells, in analogy to  
437 the human T-cells leukemia virus which encases itself in a host-derived carbohydrate-rich adhesive  
438 extracellular cocoon that enables its efficient and protected transfer between cells<sup>65,66</sup>. The  
439 increased production of PIC per cell is surprising since viral infection is thought to promote  
440 decalcification<sup>67</sup>. Nevertheless, higher turnover of coccolith shedding and recalcification, or  
441 thicker coccoliths could be potential defense mechanisms, enabling lower viral adsorption and  
442 efficient removal of attached viral particles.

443 Taken together, our results provide a strong evidence that viral infection does not only play  
444 an important ecological role as a principal cause of phytoplankton mortality, but also has profound  
445 consequences for the fate of carbon, both by diverting carbon from bacteria towards larger  
446 eukaryotes and by potentially enhancing vertical export (**Fig. 5**). This refined assessment of viral  
447 impacts on the fate of carbon in the ocean helps bridge the scales between dynamic processes at  
448 the single cell, population, and biogeochemical levels, and will thus enable us to anticipate better

449 the consequences of a changing ocean on fundamental ecosystem processes, services and  
450 feedbacks.

451  
452  
453

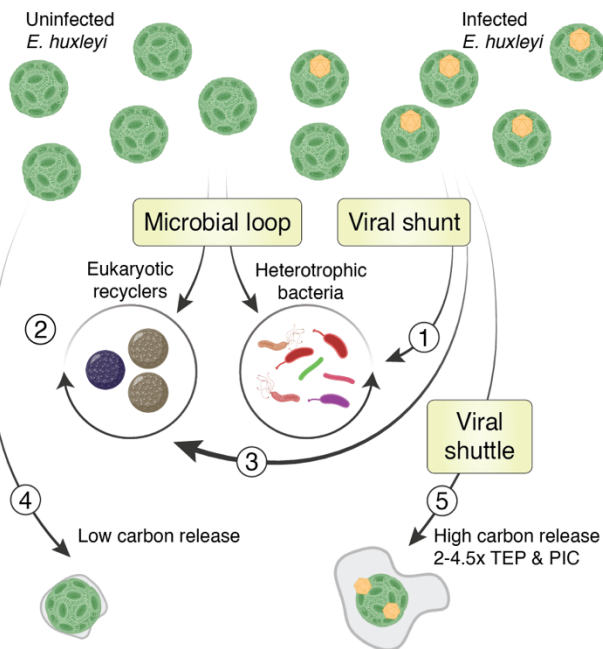

454  
455

**Figure 5: Consequences of viral infection on microbial community composition and carbon cycling.** Arrows represent the direction of carbon flow. (1) The bacterial and eukaryotic microbiomes are remodeled in response to viral infection only when level of infection is high. (2) Thraustochytrid rival bacteria as significant recyclers of organic matter during *E. huxleyi* demise. (3) Thraustochytrids benefit from viral infection of *E. huxleyi*. (4) When the demise is not virus-associated, *E. huxleyi* populations release a small amount of organic and inorganic carbon. (5) Viral infection increases *E. huxleyi* population carbon release between 2-4.5 fold under the form of TEP and PIC as compared to (4).

464  
465

### 466 Acknowledgments

467 We thank all team members of the AQUACOSM VIMS-Ehux project for setting up and  
468 conducting the mesocosm experiment. We further thank the team members and crew of the NA-  
469 VICE cruise for assistance at sea, as well as the Marine Facilities and Operations at the Woods  
470 Hole Oceanographic Institution for logistical support. We thank Miri Shnayder for help on  
471 ddPCR, Tina Trautmann for help on microarrays and Jackie Collier for discussion on  
472 Thraustochytrids. **Funding:** A.V. is The Bronfman Professorial Chair of Plant Science. This  
473 research was supported by the European Research Council CoG (VIROCELLSPHERE grant no.  
474 681715), the research grant from the Estate of Bernard Berkowitz and the Simons foundation  
475 grant (no. 735079) “Untangling the infection outcome of host-virus dynamics in algal blooms in  
476 the ocean” awarded to A.V. and the Dean of Faculty Fellowship of the Weizmann Institute of  
477 Science and Israeli Academy of Science and Humanities awarded to F.V. The mesocosm  
478 experiment VIMS-Ehux was supported by EU Horizon2020-INFRAIA project AQUACOSM

479 (grant no. 731065). The NA-VICE cruise was supported by the NSF (grant no. OCE-1059884).  
480 J.-H.H. was supported by the Max Planck Society and by the Deutsche Forschungsgemeinschaft  
481 (DFG) Emmy Noether grant HE 7217/1-1, and through the Cluster of Excellence “The Ocean  
482 Floor — Earth’s Uncharted Interface” project 390741603. O.X.C. was supported by the Simons  
483 Collaboration: Principles of Microbial Ecosystems (PriME) award no. 542395. M.G. was  
484 supported by Simons Foundation Postdoctoral Fellowship Award 599207. The ICM-CSIC group  
485 acknowledges funding from Spanish Ministry of Science and Innovation (MCIN/AEI, doi:  
486 10.13039/501100011033) through the BIOGAPS grant (CTM2016–81008–R) and the “Severo  
487 Ochoa Centre of Excellence” accreditation (CEX2019-000298-S), and from the European  
488 Research Council under the EU’s Horizon 2020 research and innovation programme through the  
489 SUMMIT grant (ERC-2018-AdG#834162). **Author contributions:** F.V., M.G., and A.V.  
490 conceptualized this study and wrote the manuscript, with input from J.-H.H., R.S. and O.X.C.  
491 F.V. and M.G. acquired flow cytometry data, performed amplicon sequencing, ddPCR analysis,  
492 smFISH, designed and wrote all scripts for data analysis. G.S., D.S. performed the qPCR  
493 analysis. M.C., M.MN., and C.M. collected biogeochemical data. C.K. and K.M. collected  
494 Flowcam data. A.S., and S.V.-M. performed epitope analysis. K.M. performed grazing assays.  
495 N.B.G. and M.F., performed biomass filtration. J.K.E. and A.L. assisted during the mesocosm  
496 experiment. All authors reviewed and edited the manuscript. **Competing interests:** The authors  
497 declare that they have no competing interests. **Data and materials availability:** All data needed  
498 to evaluate the conclusions in the paper are present in the paper and clearly indicated in the  
499 Supplementary Materials. Flow cytometry, nutrient, and temperature data are available in Dryad  
500 (<https://doi.org/10.5061/dryad.q573n5tfr>). Flowcam data is available on Ecotaxa under the  
501 project "Flowcam Composite Aquacosm\_2018\_VIMS-Ehux". Sequencing data has been  
502 deposited under NCBI Bioproject PRJNA694552: 16S data is available under Biosample  
503 SAMN17576248 and 18S data is available under Biosample SAMN20295136. Additional data  
504 related to this paper may be requested from the authors.

505

506

## 507 References

508

- 509 1. Behrenfeld, M. J. *et al.* Climate-driven trends in contemporary ocean productivity. *Nature*  
510 **444**, 752–755 (2006).
- 511 2. Schleyer, G. & Vardi, A. Algal blooms. *Curr. Biol.* **30**, R1116–R1118 (2020).
- 512 3. Behrenfeld, M. & Boss, E. S. Resurrecting the Ecological Underpinnings of Ocean  
513 Plankton Blooms. *Annu. Rev. Mar. Sci.* **6**, 167–94 (2014).
- 514 4. Pomeroy, L. R. The Ocean’s Food Web, A Changing Paradigm. *Bioscience* **24**, 499–504  
515 (1974).
- 516 5. Azam, F. *et al.* The Ecological Role of Water-Column Microbes in the Sea. *Mar. Ecol.*  
517 *Prog. Ser.* **10**, 257–263 (1983).
- 518 6. Wilhelm, S. W. & Suttle, C. A. Viruses and Nutrient Cycles in the Sea. *Bioscience* **49**,  
519 781–788 (1999).
- 520 7. Weinbauer, M. Ecology of prokaryotic viruses. *FEMS Microbiol. Rev.* **28**, 127–181  
521 (2004).
- 522 8. Guidi, L. *et al.* Plankton networks driving carbon export in the oligotrophic ocean. *Nature*  
523 **532**, 465 (2016).
- 524 9. Vincent, F., Sheyn, U., Porat, Z., Schatz, D. & Vardi, A. Visualizing active viral infection

- 525 reveals diverse cell fates in synchronized algal bloom demise. *Proc. Natl. Acad. Sci. U. S.*  
526 *A.* **118**, e2021586118 (2021).
- 527 10. Dymond, J. & Lyle, M. Flux comparisons between sediments and sediment traps in the  
528 eastern tropical Pacific: Implications for atmospheric CO<sub>2</sub> variations during the  
529 Pleistocene. *Limnol. Oceanogr.* **30**, 699–712 (1985).
- 530 11. Bratbak, G., Egge, J. K. & Heldal, M. Viral mortality of the marine alga *Emiliana huxleyi*  
531 (Haptophyceae) and termination of algal blooms. *Mar. Ecol. Prog. Ser.* **93**, 39–48 (1993).
- 532 12. Wilson, W. H. *et al.* Isolation of viruses responsible for the demise of an *Emiliana*  
533 *huxleyi* bloom in the English Channel. *J. Mar. Biol. Assoc.* **82**, 369–377 (2002).
- 534 13. Lehahn, Y. *et al.* Decoupling physical from biological processes to assess the impact of  
535 viruses on a mesoscale algal bloom. *Curr. Biol.* **24**, 2041–2046 (2014).
- 536 14. Nejstgaard, J. C., Gismervik, I. & Solberg, P. T. Feeding and reproduction by *Calanus*  
537 *finmarchicus*, and microzooplankton grazing during mesocosm blooms of diatoms and the  
538 coccolithophore *Emiliana huxleyi*. *Mar. Ecol. Prog. Ser.* **147**, 197–217 (1997).
- 539 15. Kalscheur, K., Rojas, M., Peterson, C., Kelly, J. & Gray, K. Algal exudates and stream  
540 organic matter influence the structure and function of denitrifying bacterial communities.  
541 *Microb. Ecol.* **64**, 881–892 (2012).
- 542 16. Grossart, H.-P. & Simon, M. Interactions of planktonic algae and bacteria: effects on algal  
543 growth and organic matter dynamics. *Aquat. Microb. Ecol.* **47**, 163–176 (2007).
- 544 17. Amin, S. A. *et al.* Interaction and signalling between a cosmopolitan phytoplankton and  
545 associated bacteria. *Nature* **522**, 98–101 (2015).
- 546 18. Shibl, A. A. *et al.* Diatom modulation of select bacteria through use of two unique  
547 secondary metabolites. *Proc. Natl. Acad. Sci.* **117**, 27445–27455 (2020).
- 548 19. Hahnke, R. *et al.* Dilution cultivation of marine heterotrophic bacteria abundant after a  
549 spring phytoplankton bloom in the North Sea. *Environ. Microbiol.* **17**, 3515–3526 (2015).
- 550 20. Teeling, H. *et al.* Recurring patterns in bacterioplankton dynamics during coastal spring  
551 algae blooms. *Elife* e11888 (2016). doi:10.7554/eLife.11888.001
- 552 21. Giovannoni, S. J. SAR11 Bacteria: The Most Abundant Plankton in the Oceans. *Ann. Rev.*  
553 *Mar. Sci.* **9**, 231–255 (2017).
- 554 22. Gonzalez, J. M. *et al.* Bacterial community structure associated with a  
555 dimethylsulfoniopropionate-producing North Atlantic algal bloom. *Appl. Environ.*  
556 *Microbiol.* **66**, 4237–4246 (2000).
- 557 23. Keller, M. D. Biological Oceanography Dimethyl Sulfide Production and Marine  
558 Phytoplankton: The Importance of Species Composition and Cell Size. *Biol. Oceanogr.* **6**,  
559 375–382 (1988).
- 560 24. Barak-Gavish, N. *et al.* Bacterial virulence against an oceanic bloom-forming  
561 phytoplankton is mediated by algal DMSP. *Sci. Adv.* **4**, eaau5716 (2018).
- 562 25. Tripp, H. J. *et al.* SAR11 marine bacteria require exogenous reduced sulphur for growth.  
563 *Nature* **452**, 741–744 (2008).
- 564 26. Buchan, A., Leclair, G. R., Gulvik, C. A. & González, J. M. Master recyclers : features  
565 and functions of bacteria associated with phytoplankton blooms. *Nat. Rev. Microbiol.* **12**,  
566 686–698 (2014).
- 567 27. Weinbauer, M. G. *et al.* *Synechococcus* growth in the ocean may depend on the lysis of  
568 heterotrophic bacteria. *J. Plankton Res.* **33**, 1465–1476 (2011).
- 569 28. Schatz, D. *et al.* Ecological significance of extracellular vesicles in modulating host-virus  
570 interactions during algal blooms. *ISME J.* 1–8 (2021).

- 571 29. Weitz, J. S. *et al.* A multitrophic model to quantify the effects of marine viruses on  
572 microbial food webs and ecosystem processes. *ISME J.* **9**, 1352–1364 (2015).
- 573 30. McManus, G. B. & Fuhrman, J. A. Control of marine bacterioplankton populations:  
574 Measurement and significance of grazing. *Hydrobiologia* **159**, 51–62 (1988).
- 575 31. Cavalier-Smith, T. & Chao, E. E.-Y. Phylogeny and Megasytematics of Phagotrophic  
576 Heterokonts (Kingdom Chromista). *J. Mol. Evol.* **62**, 388–420 (2006).
- 577 32. Bongiorno, L., Pusceddu, A. & Danovaro, R. Enzymatic activities of epiphytic and benthic  
578 thraustochytrids involved in organic matter degradation. *Aquat. Microb. Ecol.* **41**, 299–  
579 305 (2005).
- 580 33. Poff, K. E., Leu, A. O., Eppley, J. M., Karl, D. M. & DeLong, E. F. Microbial dynamics  
581 of elevated carbon flux in the open ocean’s abyss. *Proc. Natl. Acad. Sci. U. S. A.* **118**,  
582 e2018269118 (2021).
- 583 34. Raghukumar, S. The Marine Environment and the Role of Fungi. in *Fungi in Coastal and*  
584 *Oceanic Marine Ecosystems* 17–38 (Springer International Publishing, 2017).
- 585 35. Nakai, R. & Naganuma, T. Diversity and ecology of thraustochytrid protists in the marine  
586 environment. in *Marine Protists: Diversity and Dynamics* 331–346 (Springer Japan,  
587 2015).
- 588 36. Bennett, R., Honda, D., Beakes, G. & Thines, M. Labryinthulomycota. in *The handbook of*  
589 *the protists* (eds. JM, A., AGB, S. & Slamovits CH) 14:507–542 (Springer International  
590 Publishing, 2017).
- 591 37. Perkins, F. O. The ultrastructure of holdfasts, ‘rhizoids’, and ‘slime tracks’ in  
592 thraustochytriaceous fungi and *Labyrinthula* spp. *Arch. Mikrobiol.* **84**, 95–118 (1972).
- 593 38. Hassett, B. T. A Widely Distributed Thraustochytrid Parasite of Diatoms Isolated from the  
594 Arctic Represents a gen. and sp. nov. *J. Eukaryot. Microbiol.* **67**, 480–490 (2020).
- 595 39. Raghukumar, C. Thraustochytrid Fungi Associated with Marine Algae. *Indian Journal*  
596 *Mar. Sci.* **15**, 121–122 (1986).
- 597 40. Laundon, D., Mock, T., Wheeler, G. & Cunliffe, • Michael. Healthy herds in the  
598 phytoplankton: the benefit of selective parasitism. *ISME J.* **15**, 2163–2166 (2021).
- 599 41. Kimura, H., Fukuba, T. & Naganuma, T. Biomass of thraustochytrid protists in coastal  
600 water. *Mar. Ecol. Prog. Ser.* **189**, 27–33 (1999).
- 601 42. Ishibashi, Y., Aoki, K., Okino, N., Hayashi, M. & Ito, M. A thraustochytrid-specific  
602 lipase/phospholipase with unique positional specificity contributes to microbial  
603 competition and fatty acid acquisition from the environment. *Sci. Reports 2019 91* **9**, 1–17  
604 (2019).
- 605 43. Laber, C. P. *et al.* Coccolithovirus facilitation of carbon export in the North Atlantic. *Nat.*  
606 *Microbiol.* **3**, 537–547 (2018).
- 607 44. Collins, J. R. *et al.* The multiple fates of sinking particles in the North Atlantic Ocean.  
608 *Global Biogeochem. Cycles* **29**, 1471–1494 (2015).
- 609 45. Ramond, P. *et al.* Coupling between taxonomic and functional diversity in protistan  
610 coastal communities. *Environ. Microbiol.* **21**, 730–749 (2019).
- 611 46. Holligan, P. M. *et al.* A biogeochemical study of the coccolithophore, *Emiliania huxleyi*,  
612 in the North Atlantic. *Global Biogeochem. Cycles* **7**, 879–900 (1993).
- 613 47. Balch, W. M. *et al.* Factors regulating the Great Calcite Belt in the Southern Ocean and its  
614 biogeochemical significance. *Global Biogeochem. Cycles* **30**, 1124–1144 (2016).
- 615 48. Alldredge, A., Passow, U. & Haddock, S. H. D. The characteristics and transparent  
616 exopolymer particle (TEP) content of marine snow formed from thecate dinoflagellates. *J.*



- 617 *Plankton Res.* **20**, 393–397 (1998).
- 618 49. Passow, U. *et al.* The origin of transparent exopolymer particles (TEP) and their role in  
619 the sedimentation of particulate matter. *Cont. Shelf Res.* **21**, 327–346 (2001).
- 620 50. Vidal-Melgosa, S. *et al.* Diatom fucan polysaccharide precipitates carbon during algal  
621 blooms. *Nat. Commun.* **2021 121** **12**, 1–13 (2021).
- 622 51. Vidal-Melgosa, S. *et al.* A new versatile microarray-based method for high throughput  
623 screening of carbohydrate-active enzymes. *J. Biol. Chem.* **290**, 9020–9036 (2015).
- 624 52. Torode, T. A. *et al.* Dynamics of cell wall assembly during early embryogenesis in the  
625 brown alga *Fucus*. *J. Exp. Bot.* **67**, 6089–6100 (2016).
- 626 53. Torode, T. A. *et al.* Monoclonal Antibodies Directed to Fucoidan Preparations from  
627 Brown Algae. *PLoS One* **10**, e0118366 (2015).
- 628 54. Damare, V. & Raghukumar, S. Marine aggregates and transparent exopolymeric particles  
629 (TEPs) as substrates for the stramenopilan fungi, the thraustochytrids: Roller table  
630 experimental approach. *Kavaka* **40**, 22–31 (2012).
- 631 55. Vardi, A. *et al.* Host – virus dynamics and subcellular controls of cell fate in a natural  
632 coccolithophore population. *Proc. Natl. Acad. Sci. U. S. A.* **109**, 19327–19332 (2012).
- 633 56. Blanco-Ameisjeira, S. *et al.* Phenotypic variability in the coccolithophore *Emiliana*  
634 *huxleyi*. *PLoS One* **11**, 1–17 (2016).
- 635 57. Forterre, P. The virocell concept and environmental microbiology. *ISME J.* **7**, 233–236  
636 (2013).
- 637 58. Rosenwasser, S., Ziv, C., Graff Van Creveld, S. & Vardi, A. Virocell Metabolism:  
638 Metabolic Innovations During Host-Virus Interactions in the Ocean. *Trends Microbiol.*  
639 **24**, 821–832 (2016).
- 640 59. Emerson, S. & Hedges, J. Chemical oceanography and the marine carbon cycle. in  
641 *Chemical Oceanography and the Marine Carbon Cycle* 1–461 (Cambridge University  
642 Press, 2008).
- 643 60. Blanco-Ameijeiras, S. *et al.* Phenotypic Variability in the Coccolithophore *Emiliana*  
644 *huxleyi*. *PLoS One* **11**, e0157697 (2016).
- 645 61. Klawonn, I. *et al.* Characterizing the “fungal shunt”: Parasitic fungi on diatoms affect  
646 carbon flow and bacterial communities in aquatic microbial food webs. *Proc. Natl. Acad.*  
647 *Sci. USA* **118**, (2021).
- 648 62. Kimura, H. & Naganuma, T. Thraustochytrids: A neglected agent of the marine microbial  
649 food chain. *Aquat. Ecosyst. Health Manag.* **4**, 13–18 (2001).
- 650 63. Kuhlisch, C. *et al.* Viral infection of algal blooms leaves a unique metabolic footprint on  
651 the dissolved organic matter in the ocean. *Sci. Adv.* **7**, eabf4680 (2021).
- 652 64. Sheyn, U. *et al.* Expression profiling of host and virus during a coccolithophore bloom  
653 provides insights into the role of viral infection in promoting carbon export. *ISME J.* **12**,  
654 704–713 (2018).
- 655 65. Pais-Correia, A. M. *et al.* Biofilm-like extracellular viral assemblies mediate HTLV-1  
656 cell-to-cell transmission at virological synapses. *Nat. Med.* **16**, 83–89 (2010).
- 657 66. Thoulouze, M. I. & Alcover, A. Can viruses form biofilms? *Trends in Microbiology* **19**,  
658 257–262 (2011).
- 659 67. Johns, C. T. *et al.* The mutual interplay between calcification and coccolithovirus  
660 infection. *Environ. Microbiol.* **21**, 1896–1915 (2019).
- 661
- 662
